# Supplementary material for: Performance Factors Influencing Efficacy and Effectiveness of Iron Fortification Programs of Condiments for Improving Anemia Prevalence and Iron Status in Populations: A Systematic Review
Source: Nutrients. 2020 Jan 21;12(2):275. doi: 10.3390/nu12020275 (PMC7070935; doi:10.3390/nu12020275)
Supplement: Supplementary file 1 [file nutrients-12-00275-s001.pdf]

**Table S1.** Quality assessment of articles included in this Review. The final quality rating was based on the number of “No” answers to the 10 quality criteria as well as the number of unclear (Ucl) answers to the sub-questions within these criteria (data not shown).

[illegible]
